# Supplementary material for: CHIR99021 Maintenance of the Cell Stemness by Regulating Cellular Iron Metabolism
Source: MDPI journal article supplement (doi:10.3390/antiox12020377), 2023-02-04
Supplement: s1 [file s1]

## Supplementary Figures

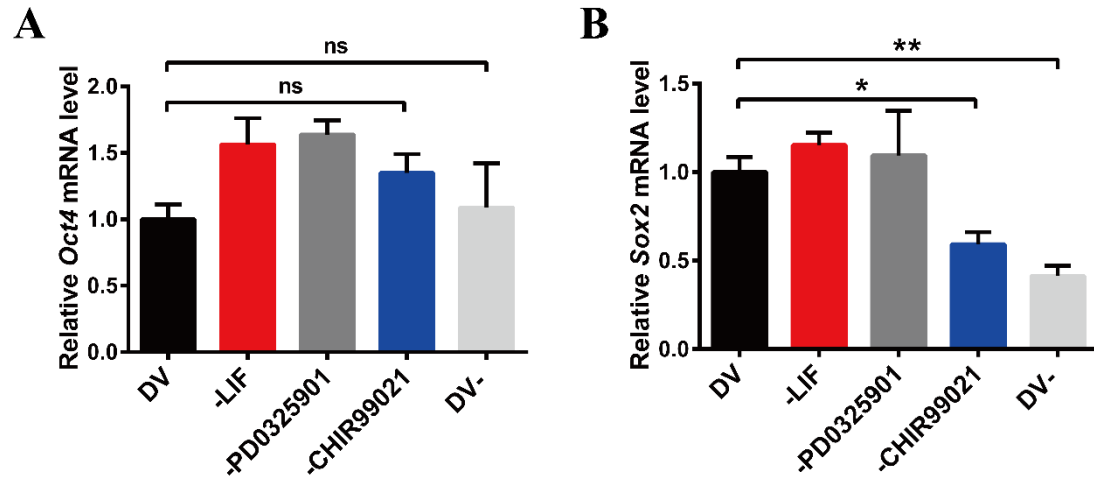

**Figure S1. Effects of removal CHIR99021 on the expression of *Oct4* and *Sox2* genes.** (A-B) qRT-PCR analysis of pluripotency genes *Oct4* (A) and *Sox2* (B) expression. DV, derivation medium; -LIF, PD0325901 or CHIR99021, derivation medium lacking the indicated component; DV-, differentiation medium lacking LIF, PD0325901 and CHIR99021. The mRNA levels are normalized to GAPDH mRNA levels. The data are expressed as the mean  $\pm$  SEM. \* $p < 0.05$ , \*\* $p < 0.01$ , ns, not significant.

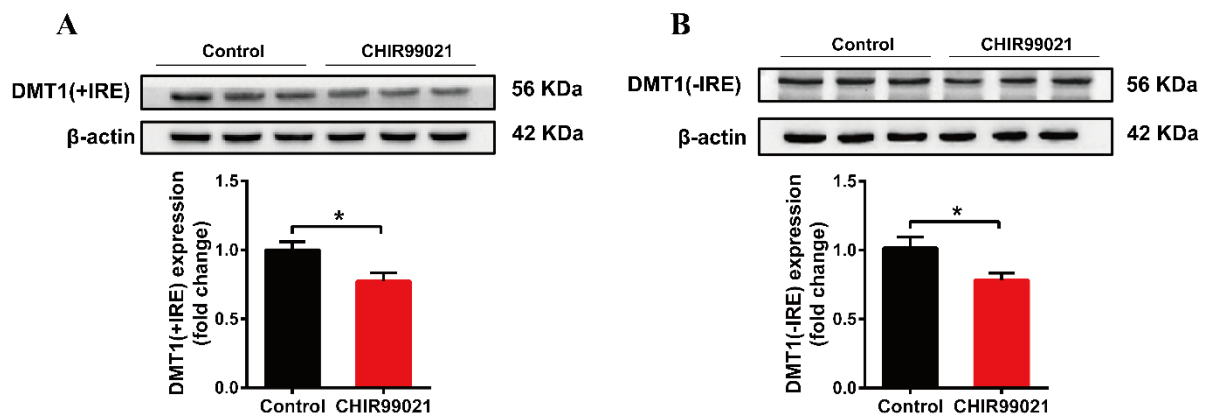

**Figure S2. Expression of DMT1 in Neuro-2a cells treated with CHIR99021.** (A-B) Western blot analysis and quantification of the expression of DMT1(+IRE) and DMT1(-IRE) protein. The relative expression levels are normalized to  $\beta$ -actin and then expressed as the fold of control group. The data are expressed as the mean  $\pm$  SEM. \* $p < 0.05$ .
